# Supplementary material for: Cognitive, functional, and neuropsychiatric correlates of regional tau pathology in autopsy-confirmed chronic traumatic encephalopathy
Source: PubMed Central journal article supplement (PMC10845638; doi:10.1186/s13024-023-00697-2), 2024-02-06
Supplement: 13024_2023_697_MOESM1_ESM.pdf [file 13024_2023_697_MOESM1_ESM.pdf]

**Supplemental Table 1.** Sample characteristics of brain donors with CTE-only

|                                          | <b>CTE-Only<br/>(n=234)</b> |
|------------------------------------------|-----------------------------|
| <b>Demographics</b>                      |                             |
| Age of death, mean (SD) years            | 56.33 (19.61)               |
| Race, n (%) Black                        | 44 (18.8)                   |
| Education Level, n (%)                   |                             |
| Some High School                         | 1 (0.4)                     |
| High School Diploma/GED                  | 3 (1.3)                     |
| Some College                             | 60 (25.6)                   |
| College Degree                           | 121 (51.7)                  |
| More than College                        | 9 (3.8)                     |
| Graduate Degree                          | 40 (17.1)                   |
| <b>Athletics</b>                         |                             |
| Sport Played, n (%) <sup>a</sup>         |                             |
| Football                                 | 218 (93.2)                  |
| Ice hockey                               | 21 (9.0)                    |
| Wrestling                                | 23 (9.8)                    |
| Soccer                                   | 22 (9.4)                    |
| Boxing                                   | 11 (4.7)                    |
| Skiing                                   | 0                           |
| Rugby                                    | 8 (3.4)                     |
| Lacrosse                                 | 8 (3.4)                     |
| Other                                    | 4 (1.7)                     |
| Years of Football Play, mean (SD)        | 13.96 (5.50)                |
| Highest Level Football Played, n (%)     |                             |
| Youth                                    | 5 (2.3)                     |
| High school                              | 19 (8.7)                    |
| College                                  | 65 (29.8)                   |
| Semi-Professional                        | 6 (2.8)                     |
| Professional                             | 123 (56.4)                  |
| Military history, n (%)                  | 44 (18.8)                   |
| <b>Medical Characteristics, n (%)</b>    |                             |
| Hypertension                             | 121 (52.6)                  |
| Obstructive sleep apnea                  | 59 (25.9)                   |
| Substance use treatment                  | 66 (28.4)                   |
| <b>Neuropathological Characteristics</b> |                             |
| CTE stage, n (%)                         |                             |
| Stage I                                  | 61 (26.1)                   |
| Stage II                                 | 52 (22.2)                   |
| Stage III                                | 91 (38.9)                   |
| Stage IV                                 | 30 (12.8)                   |

**Note.** Sample included brain donors who had CTE and no other neurodegenerative disease, defined by Alzheimer’s disease, Lewy body disease, frontotemporal lobar degeneration, and/or motor neuron disease. <sup>a</sup>Categories are not mutually exclusive  
Abbreviations: CTE = chronic traumatic encephalopathy

**Supplemental Table 2.** Semi-quantitative ratings of p-tau severity in brain donors with CTE-only

|                                           | <b>CTE-only<br/>N = 234</b> |
|-------------------------------------------|-----------------------------|
| <b>Dorsolateral frontal cortex, n=231</b> |                             |
| None                                      | 26 (11.3)                   |
| Mild                                      | 80 (34.6)                   |
| Moderate                                  | 68 (29.4)                   |
| Severe                                    | 57 (24.7)                   |
| <b>Inferior frontal cortex, n=225</b>     |                             |
| None                                      | 70 (31.1)                   |
| Mild                                      | 92 (40.9)                   |
| Moderate                                  | 42 (18.7)                   |
| Severe                                    | 21 (9.3)                    |
| <b>Superior temporal cortex, n=230</b>    |                             |
| None                                      | 52 (22.6)                   |
| Mild                                      | 68 (29.6)                   |
| Moderate                                  | 66 (28.7)                   |
| Severe                                    | 44 (19.1)                   |
| <b>Inferior parietal cortex, n=229</b>    |                             |
| None                                      | 75 (32.8)                   |
| Mild                                      | 87 (38.0)                   |
| Moderate                                  | 39 (17.0)                   |
| Severe                                    | 28 (12.2)                   |
| <b>CA1-hippocampus, n=228</b>             |                             |
| None                                      | 58 (25.4)                   |
| Mild                                      | 84 (36.8)                   |
| Moderate                                  | 38 (16.7)                   |
| Severe                                    | 48 (21.1)                   |
| <b>CA2-hippocampus, n=225</b>             |                             |
| None                                      | 85 (37.8)                   |
| Mild                                      | 59 (26.2)                   |
| Moderate                                  | 45 (20.0)                   |
| Severe                                    | 36 (16.0)                   |
| <b>CA4-hippocampus, n=228</b>             |                             |
| None                                      | 84 (36.8)                   |
| Mild                                      | 86 (37.7)                   |
| Moderate                                  | 26 (11.4)                   |
| Severe                                    | 32 (14.0)                   |
| <b>Entorhinal cortex, n=231</b>           |                             |
| None                                      | 36 (15.6)                   |
| Mild                                      | 53 (22.9)                   |
| Moderate                                  | 73 (31.6)                   |
| Severe                                    | 69 (29.9)                   |
| <b>Amygdala, n=229</b>                    |                             |
| None                                      | 45 (19.7)                   |
| Mild                                      | 85 (37.1)                   |
| Moderate                                  | 58 (25.3)                   |
| Severe                                    | 41 (17.9)                   |
| <b>Locus coeruleus, n=217</b>             |                             |
| None                                      | 19 (8.8)                    |
| Mild                                      | 42 (19.4)                   |
| Moderate                                  | 88 (40.6)                   |
| Severe                                    | 68 (31.3)                   |

**Note.** Sample included brain donors who had CTE and no other neurodegenerative disease, defined by Alzheimer's disease, Lewy body disease, frontotemporal lobar degeneration, and/or motor neuron disease. Sample sizes vary due to missing data. Abbreviations: CTE = chronic traumatic encephalopathy

**Supplemental Table 3.** Descriptive statistics of informant-completed standardized clinical scales

|                                      | CTE-only |       |                   |
|--------------------------------------|----------|-------|-------------------|
|                                      | Mean     | SD    | Impaired<br>n (%) |
| <b>Cognitive Function</b>            |          |       |                   |
| CDS, n=215                           | 78.65    | 42.37 | --                |
| BRIEF-A MI, n=215                    | 85.50    | 20.99 | 153 (71.2)        |
| <b>Daily Function</b>                |          |       |                   |
| FAQ, n=224                           | 10.77    | 10.55 | 100 (44.6)        |
| <b>Neurobehavioral Dysregulation</b> |          |       |                   |
| BIS-11, n=213                        | 74.01    | 16.1  | --                |
| BRIEF-A BRI, n=215                   | 65.27    | 15.23 | 156 (72.6)        |
| Brown-Goodwin-Adult<br>Sum, n=203    | 18.16    | 6.30  | --                |
| <b>Depression and Apathy</b>         |          |       |                   |
| GDS-15, n=217                        | 8.94     | 4.49  | 169 (77.9)        |
| AES, n=211                           | 46.34    | 13.96 | 164 (77.7)        |

**Note.** Sample included brain donors who had CTE and no other neurodegenerative disease, defined by Alzheimer’s disease, Lewy body disease, frontotemporal lobar degeneration, and/or motor neuron disease. Sample sizes vary across scales due to missing data. BRIEF-A MI and BRI are T-scores and a  $T \geq 65$  reflects clinically meaningful symptoms of executive dysfunction and behavioral dysregulation, respectively. A score of 9 or higher on the FAQ is indicative of functional impairment and scores of 5 and 34 or higher on the GDS-15 and AES represent clinically meaningful symptoms of depression and apathy, respectively. For the remaining scales, strongly supported cutoffs have not been identified in the literature.

Abbreviations: CTE = chronic traumatic encephalopathy, CDS = Cognitive Difficulties Scale, BRIEF-A = Behavior Rating Inventory of Executive Function for Adults, MI = Metacognition Index, FAQ = Functional Activities Questionnaire, BIS-11 = Barratt Impulsiveness Scale, GDS = Geriatric Depression Scale, 15-item version, AES = Apathy Evaluation Scale

**Supplemental Table 4.** Association between regional p-tau and cognitive and daily function scales: summary of multivariable OLS regression adjusted for CERAD neuritic amyloid plaque score, limbic/neocortical LBD and FTLD.

|                   | CDS Total Score<br>(n = 282) |             |       | CDS Attention Factor Score<br>(n = 282) |             |       | CDS Memory Factor Score<br>(n = 282) |             |      | CDS Language Factor Score<br>(n = 282) |             |      | CDS Motor Factor Score<br>(n = 282) |             |      | BRIEF-A MI<br>(n = 283) |             |      | FAQ<br>(n = 288) |             |       |
|-------------------|------------------------------|-------------|-------|-----------------------------------------|-------------|-------|--------------------------------------|-------------|------|----------------------------------------|-------------|------|-------------------------------------|-------------|------|-------------------------|-------------|------|------------------|-------------|-------|
|                   | b                            | 95% CI      | p     | b                                       | 95% CI      | p     | beta                                 | 95% CI      | p    | b                                      | 95% CI      | p    | b                                   | 95% CI      | p    | b                       | 95% CI      | p    | b                | 95% CI      | p     |
| Frontal           | 0.18                         | 0.06, 0.29  | <0.01 | 0.20                                    | 0.08, 0.32  | <0.01 | 0.16                                 | 0.04, 0.28  | 0.03 | 0.16                                   | 0.04, 0.28  | 0.04 | 0.13                                | 0.01, 0.25  | 0.09 | 0.19                    | 0.06, 0.33  | 0.05 | 0.15             | 0.05, 0.26  | <0.01 |
| Superior temporal | 0.08                         | -0.03, 0.19 | 0.40  | 0.10                                    | -0.02, 0.21 | 0.22  | 0.08                                 | -0.03, 0.20 | 0.43 | 0.08                                   | -0.03, 0.2  | 0.31 | 0.04                                | -0.08, 0.15 | 0.67 | 0.03                    | -0.1, 0.16  | 0.86 | 0.12             | 0.02, 0.22  | 0.03  |
| Inferior parietal | 0.15                         | 0.03, 0.26  | 0.03  | 0.18                                    | 0.06, 0.3   | <0.01 | 0.16                                 | 0.04, 0.27  | 0.03 | 0.13                                   | 0.01, 0.25  | 0.10 | 0.15                                | 0.03, 0.27  | 0.04 | 0.11                    | -0.03, 0.24 | 0.34 | 0.12             | 0.02, 0.22  | 0.05  |
| Amygdala          | 0.07                         | -0.06, 0.19 | 0.56  | 0.11                                    | -0.02, 0.24 | 0.22  | 0.03                                 | -0.09, 0.16 | 0.82 | 0.09                                   | -0.04, 0.21 | 0.34 | 0.11                                | -0.02, 0.24 | 0.18 | 0.08                    | -0.06, 0.23 | 0.58 | 0.13             | 0.02, 0.24  | 0.05  |
| Entorhinal        | -0.01                        | -0.13, 0.11 | 0.93  | 0.01                                    | -0.11, 0.13 | 0.92  | -                                    | -0.17, 0.07 | 0.80 | 0.00                                   | -0.12, 0.12 | 0.99 | 0.06                                | -0.06, 0.18 | 0.60 | -0.01                   | -0.15, 0.13 | 0.9  | 0.07             | -0.04, 0.17 | 0.40  |
| Hippocampus       | -0.03                        | -0.16, 0.09 | 0.75  | -                                       | -0.14, 0.11 | 0.92  | -                                    | -0.2, 0.05  | 0.53 | -0.05                                  | -0.18, 0.07 | 0.65 | 0.07                                | -0.06, 0.19 | 0.51 | 0.01                    | -0.13, 0.15 | 0.84 | 0.03             | -0.07, 0.14 | 0.80  |
| Locus coeruleus   | 0.00                         | -0.11, 0.11 | 0.98  | -                                       | -0.12, 0.1  | 0.92  | -                                    | -0.13, 0.09 | 0.82 | -0.02                                  | -0.13, 0.09 | 0.80 | 0.04                                | -0.07, 0.15 | 0.67 | 0.02                    | -0.1, 0.15  | 0.86 | 0.03             | -0.06, 0.12 | 0.80  |

**Note.** Estimates are standardized betas. Regional p-tau severity was rated on a 0-3 scale with 0 being none and 3 being severe. Frontal is a summary composite of the dorsolateral frontal cortex and the inferior frontal cortex. CA1, CA2, and CA4 were summed to create the hippocampus composite. For all clinical scales, higher scores are worse. P-values were false discovery rate adjusted using the Benjamini-Hochberg procedure. Models were adjusted for age at death, racial identity, education level, history of hypertension and obstructive sleep apnea, history of substance use treatment, CERAD neuritic amyloid plaque score, limbic/neocortical LBD and FTLD.

Abbreviations: CERAD = Consortium to Establish a Registry for Alzheimer’s disease, LBD = Lewy Body Disease, FTLD = frontotemporal lobar degeneration, OLS = ordinary least squares, CDS = Cognitive Difficulties Scale, BRIEF-A = Behavior Rating Inventory of Executive Function for Adults, MI = Metacognition Index, FAQ = Functional Activities Questionnaire

**Supplemental Table 5.** Association between regional p-tau and scales of neurobehavioral dysregulation, depression, and apathy: summary of multivariable OLS regression results adjusted for CERAD neuritic amyloid plaque score, limbic/neocortical LBD and FTLD.

| P-tau ratings     | BRIEF-A BRI<br>(n = 283) |             |      | BIS-11<br>(n = 281) |             |      | Brown Goodwin<br>(n = 261) |             |      | GDS-15<br>(n = 284) |             |      | AES<br>(n = 279) |             |      |
|-------------------|--------------------------|-------------|------|---------------------|-------------|------|----------------------------|-------------|------|---------------------|-------------|------|------------------|-------------|------|
|                   | b                        | 95% CI      | p    | b                   | 95% CI      | p    | b                          | 95% CI      | p    | b                   | 95% CI      | p    | b                | 95% CI      | p    |
| Frontal           | 0.16                     | 0.02, 0.3   | 0.13 | 0.12                | -0.02, 0.26 | 0.6  | -0.06                      | -0.2, 0.08  | 0.56 | 0.06                | -0.08, 0.20 | 0.71 | 0.06             | -0.08, 0.2  | 0.81 |
| Superior temporal | 0.05                     | -0.08, 0.19 | 0.8  | 0.03                | -0.1, 0.16  | 0.97 | -0.06                      | -0.19, 0.08 | 0.56 | 0.02                | -0.11, 0.15 | 0.82 | 0.03             | -0.1, 0.16  | 0.81 |
| Inferior parietal | 0.05                     | -0.09, 0.19 | 0.8  | 0.02                | -0.12, 0.16 | 0.97 | -0.06                      | -0.2, 0.08  | 0.56 | 0.04                | -0.09, 0.18 | 0.82 | 0.07             | -0.07, 0.20 | 0.81 |
| Amygdala          | 0.01                     | -0.14, 0.16 | 0.91 | 0.05                | -0.1, 0.19  | 0.97 | 0.06                       | -0.09, 0.21 | 0.57 | 0.02                | -0.13, 0.17 | 0.82 | 0.08             | -0.06, 0.23 | 0.81 |
| Entorhinal        | -0.04                    | -0.18, 0.1  | 0.8  | 0.03                | -0.11, 0.16 | 0.97 | 0.02                       | -0.12, 0.16 | 0.75 | 0.07                | -0.06, 0.21 | 0.58 | -0.01            | -0.14, 0.13 | 0.92 |
| Hippocampus       | 0.04                     | -0.1, 0.19  | 0.8  | 0.00                | -0.14, 0.14 | 0.97 | 0.10                       | -0.04, 0.24 | 0.38 | 0.11                | -0.03, 0.25 | 0.43 | 0.01             | -0.13, 0.15 | 0.92 |
| Locus coeruleus   | 0.02                     | -0.11, 0.15 | 0.8  | -0.01               | -0.13, 0.12 | 0.97 | 0.04                       | -0.09, 0.17 | 0.57 | 0.07                | -0.1, 0.15  | 0.82 | 0.02             | -0.1, 0.15  | 0.83 |

**Note.** Estimates are standardized betas. Regional p-tau severity was rated on a 0-3 scale with 0 being none and 3 being severe. Frontal is a summary composite of the dorsolateral frontal cortex and the inferior frontal cortex. CA1, CA2, and CA4 were summed to create the hippocampus composite. For all clinical scales, higher scores are worse. P-values were false discovery rate adjusted using the Benjamini-Hochberg procedure. Models were adjusted for age at death, racial identity, education level, history of hypertension and obstructive sleep apnea, history of substance use treatment, CERAD neuritic amyloid plaque score, limbic/neocortical LBD and FTLD.

Abbreviations: CERAD = Consortium to Establish a Registry for Alzheimer’s disease, LBD = Lewy Body Disease, FTLD = frontotemporal lobar degeneration, OLS = ordinary least squares, BRIEF-A = Behavior Rating Inventory of Executive Function for Adults, BRI = Behavioral Regulation Index, BIS-11 = Barratt Impulsiveness Scale, GDS = Geriatric Depression Scale, 15-item version, AES = Apathy Evaluation Scale

**Supplemental Table 6.** Association between regional p-tau and standardized scales: summary of ridge regression coefficients adjusted for CERAD neuritic amyloid plaque score, limbic/neocortical LBD and FTLD.

|                   | CDS Total  |             | CDS-Attention |             | CDS. Memory |             | CDS Language |              | CDS Motor  |             | BRIEF-A MI |             | FAQ        |             | BRIEF-A BRI |             | BIS-11     |             | Brown-Goodwin |             | GDS-15     |             | AES        |             |
|-------------------|------------|-------------|---------------|-------------|-------------|-------------|--------------|--------------|------------|-------------|------------|-------------|------------|-------------|-------------|-------------|------------|-------------|---------------|-------------|------------|-------------|------------|-------------|
|                   | Ridge coef | 95% CI      | Ridge coef    | 95% CI      | Ridge coef  | 95% CI      | Ridge coef   | 95% CI       | Ridge coef | 95% CI      | Ridge coef | 95% CI      | Ridge coef | 95% CI      | Ridge coef  | 95% CI      | Ridge coef | 95% CI      | Ridge coef    | 95% CI      | Ridge coef | 95% CI      | Ridge coef | 95% CI      |
| Frontal           | 0.14       | 0.06, 0.22  | 0.12          | 0.06, 0.18  | 0.14        | 0.04, 0.24  | 0.12         | 0.05, 0.2    | 0.07       | 0.02, 0.12  | 0.12       | 0.04, 0.19  | 0.09       | 0.02, 0.16  | 0.06        | 0.01, 0.1   | 0.04       | 0.01, 0.09  | -0.03         | -0.08, 0.03 | 0.00       | -0.02, 0.01 | 0.03       | -0.01, 0.07 |
| Superior temporal | 0.01       | -0.07, 0.10 | 0.02          | -0.05, 0.09 | 0.03        | -0.05, 0.12 | 0.03         | -0.04, 0.12  | -0.01      | -0.07, 0.05 | -0.01      | -0.08, 0.05 | 0.05       | -0.02, 0.13 | 0.01        | -0.03, 0.05 | 0.00       | -0.04, 0.06 | -0.04         | -0.10, 0.02 | 0.00       | -0.02, 0.02 | 0.02       | -0.01, 0.06 |
| Inferior parietal | 0.09       | 0.01, 0.18  | 0.09          | 0.01, 0.15  | 0.11        | 0.02, 0.21  | 0.07         | 0.00, 0.15   | 0.08       | 0.02, 0.14  | 0.05       | -0.01, 0.12 | 0.05       | -0.03, 0.14 | 0.01        | -0.03, 0.06 | -0.01      | -0.05, 0.03 | -0.04         | -0.10, 0.02 | 0.00       | -0.02, 0.02 | 0.03       | -0.01, 0.7  |
| Amygdala          | 0.05       | -0.04, 0.14 | 0.07          | 0.01, 0.15  | 0.04        | -0.06, 0.14 | 0.08         | 0.00, 0.17   | 0.06       | 0.00, 0.12  | 0.04       | -0.03, 0.11 | 0.09       | 0.02, 0.16  | -0.01       | -0.05, 0.04 | 0.00       | -0.04, 0.04 | 0.01          | -0.06, 0.06 | -0.01      | -0.03, 0.01 | 0.04       | 0.01, 0.07  |
| Entorhinal        | -0.05      | -0.14, 0.04 | -0.03         | -0.11, 0.04 | -0.07       | -0.16, 0.03 | -0.03        | -0.11, 0.04  | 0.01       | -0.05, 0.07 | -0.04      | -0.12, 0.02 | 0.00       | -0.08, 0.07 | -0.03       | -0.07, 0.01 | 0.00       | -0.04, 0.04 | 0.00          | -0.05, 0.06 | 0.00       | -0.02, 0.02 | 0.00       | -0.03, 0.04 |
| Hippocampus       | -0.03      | -0.11, 0.06 | -0.02         | -0.09, 0.05 | -0.05       | -0.14, 0.06 | -0.05        | -0.13, 0.03  | 0.03       | -0.04, 0.09 | 0.00       | -0.06, 0.07 | -0.01      | -0.09, 0.06 | 0.00        | -0.05, 0.04 | -0.02      | -0.06, 0.02 | 0.04          | -0.01, 0.11 | 0.00       | -0.02, 0.02 | 0.01       | -0.03, 0.04 |
| Locus coeruleus   | -0.03      | -0.1, 0.04  | -0.04         | -0.11, 0.02 | -0.03       | -0.1, 0.05  | -0.04        | -0.11, -0.03 | -0.01      | -0.07, 0.04 | -0.01      | -0.07, 0.06 | -0.02      | -0.1, 0.04  | 0.01        | -0.03, 0.06 | 0.00       | -0.04, 0.05 | 0.01          | -0.06, 0.09 | 0.00       | -0.03, 0.02 | 0.01       | -0.03, 0.05 |

**Note.** To investigate which regions may be driving the associations, independent of the effects from the other regions, multivariable ridge regression models were performed for the regional scales of p-tau severity. Ridge regression is used when there are many independent variables that are highly correlated. A separate ridge regression was performed for each clinical scale. Estimates are standardized betas. Models were adjusted for age at death, racial identity, education level, history of hypertension, obstructive sleep apnea, history of substance use treatment, CERAD neuritic amyloid plaque score, limbic/neocortical LBD and FTLD. Frontal is a summary composite of the dorsolateral frontal cortex and the inferior frontal cortex. CA1, CA2, and CA4 were summed to create the hippocampus composite. For all clinical scales, higher scores are worse.

Abbreviations: CERAD = Consortium to Establish a Registry for Alzheimer’s disease, LBD = Lewy Body Disease, FTLD = frontotemporal lobar degeneration, CDS = Cognitive Difficulties Scale, BRIEF-A = Behavior Rating Inventory of Executive Function for Adults, MI = Metacognition Index, FAQ = Functional Activities Questionnaire, BRI = Behavioral Regulation Index, BIS-11 = Barratt Impulsiveness Scale, GDS = Geriatric Depression Scale, 15-item version, AES = Apathy Evaluation Scale

**Supplemental Table 7.** Association between regional p-tau and cognitive and daily function scales: summary of multivariable OLS regression results in brain donors with CTE-only

|                   | CDS Total Score<br>(n = 184) |             |      | CDS Attention Factor Score<br>(n = 184) |             |      | CDS Memory Factor Score<br>(n = 184) |             |      | CDS Language Factor Score<br>(n = 184) |             |      | CDS Motor Factor Score<br>(n = 184) |             |      | BRIEF-A MI<br>(n = 185) |             |      | FAQ<br>(n = 188) |             |      |  |
|-------------------|------------------------------|-------------|------|-----------------------------------------|-------------|------|--------------------------------------|-------------|------|----------------------------------------|-------------|------|-------------------------------------|-------------|------|-------------------------|-------------|------|------------------|-------------|------|--|
|                   | b                            | 95% CI      | p    | b                                       | 95% CI      | p    | b                                    | 95% CI      | p    | b                                      | 95% CI      | p    | b                                   | 95% CI      | p    | b                       | 95% CI      | p    | b                | 95% CI      | p    |  |
| P-tau ratings     |                              |             |      |                                         |             |      |                                      |             |      |                                        |             |      |                                     |             |      |                         |             |      |                  |             |      |  |
| Frontal           | 0.17                         | 0.03, 0.31  | 0.14 | 0.18                                    | 0.03, 0.32  | 0.14 | 0.15                                 | 0.01, 0.29  | 0.28 | 0.16                                   | 0.02, 0.31  | 0.14 | 0.07                                | -0.07, 0.22 | 0.64 | 0.20                    | 0.04, 0.35  | 0.14 | 0.15             | 0.02, 0.27  | 0.14 |  |
| Superior temporal | 0.05                         | -0.09, 0.2  | 0.79 | 0.06                                    | -0.09, 0.2  | 0.65 | 0.07                                 | -0.08, 0.21 | 0.83 | 0.04                                   | -0.11, 0.18 | 0.81 | -0.01                               | -0.15, 0.14 | 0.97 | 0.02                    | -0.14, 0.17 | 0.89 | 0.09             | -0.04, 0.21 | 0.40 |  |
| Inferior parietal | 0.08                         | -0.06, 0.22 | 0.76 | 0.10                                    | -0.05, 0.24 | 0.65 | 0.09                                 | -0.05, 0.23 | 0.59 | 0.10                                   | -0.04, 0.24 | 0.48 | 0.00                                | -0.14, 0.14 | 0.97 | 0.07                    | -0.08, 0.22 | 0.70 | 0.06             | -0.06, 0.19 | 0.58 |  |
| Amygdala          | 0.07                         | -0.1, 0.24  | 0.79 | 0.09                                    | -0.08, 0.26 | 0.65 | 0.05                                 | -0.12, 0.22 | 0.83 | 0.13                                   | -0.04, 0.3  | 0.46 | 0.11                                | -0.06, 0.28 | 0.61 | 0.14                    | -0.04, 0.32 | 0.61 | 0.14             | 0.00, 0.28  | 0.23 |  |
| Entorhinal        | -0.07                        | -0.23, 0.1  | 0.79 | -0.05                                   | -0.22, 0.12 | 0.65 | -0.11                                | -0.27, 0.06 | 0.59 | -0.03                                  | -0.2, 0.13  | 0.81 | -0.04                               | -0.21, 0.12 | 0.97 | -0.03                   | -0.21, 0.15 | 0.89 | -0.04            | -0.18, 0.1  | 0.73 |  |
| Hippocampus       | 0.04                         | -0.13, 0.22 | 0.79 | 0.06                                    | -0.12, 0.24 | 0.65 | 0.02                                 | -0.16, 0.19 | 0.93 | 0.08                                   | -0.1, 0.25  | 0.78 | 0.10                                | -0.07, 0.28 | 0.61 | 0.07                    | -0.12, 0.27 | 0.70 | -0.02            | -0.16, 0.13 | 0.84 |  |
| Locus coeruleus   | 0.01                         | -0.14, 0.17 | 0.92 | 0.00                                    | -0.15, 0.16 | 0.96 | 0.01                                 | -0.15, 0.16 | 0.93 | 0.03                                   | -0.13, 0.18 | 0.81 | -0.01                               | -0.17, 0.14 | 0.97 | 0.10                    | -0.07, 0.27 | 0.67 | -0.05            | -0.19, 0.08 | 0.63 |  |

**Note.** Sample included brain donors who had CTE and no other neurodegenerative disease, defined by Alzheimer’s disease, Lewy body disease, frontotemporal lobar degeneration, and/or motor neuron disease. Estimates are standardized betas. Regional p-tau severity was rated on a 0-3 scale with 0 being none and 3 being severe. Frontal is a summary composite of the dorsolateral frontal cortex and the inferior frontal cortex. CA1, CA2, and CA4 were summed to create the hippocampus composite. For all clinical scales, higher scores are worse. P-values were false discovery rate adjusted using the Benjamini-Hochberg procedure. Models were adjusted for age at death, racial identity, education level, history of hypertension and obstructive sleep apnea, and history of substance use treatment.

Abbreviations: OLS = ordinary least squares, BRIEF-A = Behavior Rating Inventory of Executive Function for Adults, BRI = Behavioral Regulation Index, BIS-11 = Barratt Impulsiveness Scale, GDS = Geriatric Depression Scale, 15-item version, AES = Apathy Evaluation Scale

**Supplemental Table 8.** Association between regional p-tau and scales of neurobehavioral dysregulation, depression, and apathy: summary of multivariable OLS regression results in brain donors with CTE-only

| P-tau ratings     | BRIEF-A BRI<br>(n = 185) |             |      | BIS-11<br>(n = 183) |             |      | Brown Goodwin<br>(n = 170) |             |      | GDS-15<br>(n = 186) |             |      | AES<br>(n = 181) |             |      |
|-------------------|--------------------------|-------------|------|---------------------|-------------|------|----------------------------|-------------|------|---------------------|-------------|------|------------------|-------------|------|
|                   | b                        | 95% CI      | p    | b                   | 95% CI      | p    | b                          | 95% CI      | p    | b                   | 95% CI      | p    | b                | 95% CI      | p    |
| Frontal           | 0.18                     | 0.03, 0.33  | 0.14 | 0.09                | -0.06, 0.24 | 0.69 | -0.08                      | -0.24, 0.07 | 0.56 | 0.05                | -0.1, 0.2   | 0.77 | 0.09             | -0.06, 0.24 | 0.73 |
| Superior temporal | 0.03                     | -0.12, 0.18 | 0.90 | 0.00                | -0.15, 0.15 | 0.98 | -0.06                      | -0.22, 0.09 | 0.62 | 0.00                | -0.15, 0.15 | 0.98 | 0.03             | -0.12, 0.18 | 0.93 |
| Inferior parietal | 0.05                     | -0.10, 0.20 | 0.79 | -0.05               | -0.19, 0.1  | 0.69 | -0.06                      | -0.21, 0.09 | 0.62 | -0.03               | -0.17, 0.12 | 0.90 | 0.02             | -0.13, 0.16 | 0.93 |
| Amygdala          | 0.04                     | -0.14, 0.23 | 0.88 | 0.07                | -0.11, 0.25 | 0.69 | 0.06                       | -0.12, 0.25 | 0.62 | 0.01                | -0.17, 0.18 | 0.98 | 0.12             | -0.06, 0.3  | 0.63 |
| Entorhinal        | 0.01                     | -0.16, 0.19 | 0.91 | 0.08                | -0.1, 0.25  | 0.69 | 0.08                       | -0.1, 0.26  | 0.62 | 0.06                | -0.11, 0.23 | 0.77 | -0.02            | -0.19, 0.16 | 0.93 |
| Hippocampus       | 0.15                     | -0.04, 0.34 | 0.39 | 0.12                | -0.06, 0.3  | 0.69 | 0.12                       | -0.06, 0.31 | 0.44 | 0.14                | -0.04, 0.32 | 0.36 | 0.03             | -0.15, 0.22 | 0.93 |
| Locus coeruleus   | 0.08                     | -0.09, 0.25 | 0.68 | 0.06                | -0.1, 0.22  | 0.69 | 0.03                       | -0.13, 0.2  | 0.70 | 0.05                | -0.11, 0.21 | 0.77 | 0.00             | -0.16, 0.17 | 0.96 |

**Note.** Sample included brain donors who had CTE and no other neurodegenerative disease, defined by Alzheimer’s disease, Lewy body disease, frontotemporal lobar degeneration, and/or motor neuron disease. Estimates are standardized betas. Regional p-tau severity was rated on a 0-3 scale with 0 being none and 3 being severe. Frontal is a summary composite of the dorsolateral frontal cortex and the inferior frontal cortex. CA1, CA2, and CA4 were summed to create the hippocampus composite. For all clinical scales, higher scores are worse. P-values were false discovery rate adjusted using the Benjamini-Hochberg procedure. Models were adjusted for age at death, racial identity, education level, history of hypertension and obstructive sleep apnea, and history of substance use treatment.

Abbreviations: OLS = ordinary least squares, BRIEF-A = Behavior Rating Inventory of Executive Function for Adults, BRI = Behavioral Regulation Index, BIS-11 = Barratt Impulsiveness Scale, GDS = Geriatric Depression Scale, 15-item version, AES = Apathy Evaluation Scale



**Supplemental Table 9.** Association between regional p-tau and standardized scales: summary of ridge regression coefficients in brain donors with CTE-only

|                   | CDS Total  |             | CDS-Attention |             | CDS. Memory |             | CDS Language |             | CDS Motor  |             | BRIEF-A MI |             | FAQ        |              | BRIEF-A BRI |             | BIS-11     |             | Brown-Goodwin |             | GDS-15     |             | AES        |             |
|-------------------|------------|-------------|---------------|-------------|-------------|-------------|--------------|-------------|------------|-------------|------------|-------------|------------|--------------|-------------|-------------|------------|-------------|---------------|-------------|------------|-------------|------------|-------------|
|                   | Ridge coef | 95% CI      | Ridge coef    | 95% CI      | Ridge coef  | 95% CI      | Ridge coef   | 95% CI      | Ridge coef | 95% CI      | Ridge coef | 95% CI      | Ridge coef | 95% CI       | Ridge coef  | 95% CI      | Ridge coef | 95% CI      | Ridge coef    | 95% CI      | Ridge coef | 95% CI      | Ridge coef | 95% CI      |
| Frontal           | 0.09       | 0.02, 0.15  | 0.10          | 0.04, 0.16  | 0.10        | 0.00, 0.19  | 0.08         | 0.02, 0.15  | 0.05       | -0.02, 0.12 | 0.02       | 0.01, 0.04  | 0.17       | 0.04, 0.31   | 0.05        | 0.01, 0.1   | 0.04       | -0.02, 0.10 | -0.07         | -0.15, 0.02 | 0.02       | -0.03, 0.07 | 0.04       | -0.02, 0.11 |
| Superior temporal | 0.01       | -0.06, 0.07 | 0.01          | -0.05, 0.08 | 0.02        | -0.06, 0.09 | 0.00         | -0.06, 0.07 | -0.01      | -0.08, 0.07 | 0.00       | -0.01, 0.01 | 0.03       | -0.10, 0.18  | -0.01       | -0.04, 0.03 | -0.02      | -0.09, 0.05 | -0.06         | -0.17, 0.04 | -0.01      | -0.06, 0.05 | 0.01       | -0.04, 0.06 |
| Inferior parietal | 0.01       | -0.06, 0.07 | 0.02          | -0.05, 0.09 | 0.03        | -0.06, 0.12 | 0.02         | -0.05, 0.08 | -0.02      | -0.08, 0.05 | 0.00       | -0.02, 0.01 | -0.03      | -0.16, 0.10  | 0.00        | -0.04, 0.05 | -0.05      | -0.11, 0.01 | -0.03         | -0.12, 0.05 | -0.03      | -0.09, 0.03 | -0.01      | -0.07, 0.05 |
| Amygdala          | 0.05       | -0.01, 0.11 | 0.05          | -0.02, 0.11 | 0.05        | -0.04, 0.15 | 0.07         | 0.01, 0.13  | 0.08       | 0.01, 0.16  | 0.01       | -0.01, 0.02 | 0.18       | 0.02, 0.34   | -0.02       | -0.07, 0.02 | 0.00       | -0.06, 0.07 | 0.01          | -0.09, 0.10 | -0.03      | -0.08, 0.03 | 0.06       | 0.01, 0.12  |
| Entorhinal        | -0.04      | -0.11, 0.01 | -0.03         | -0.09, 0.04 | -0.09       | -0.19, 0.01 | -0.02        | -0.07, 0.03 | -0.03      | -0.10, 0.04 | 0.00       | -0.01, 0.02 | -0.14      | -0.28, -0.02 | -0.02       | -0.07, 0.02 | 0.00       | -0.06, 0.06 | 0.04          | -0.04, 0.14 | 0.00       | -0.06, 0.06 | -0.01      | -0.08, 0.05 |
| Hippocampus       | 0.05       | -0.02, 0.12 | 0.05          | -0.02, 0.12 | 0.05        | -0.05, 0.16 | 0.06         | 0.00, 0.13  | 0.08       | 0.00, 0.17  | 0.01       | 0.00, 0.03  | -0.04      | -0.18, 0.10  | 0.01        | -0.03, 0.04 | 0.01       | -0.06, 0.07 | 0.04          | -0.05, 0.13 | 0.02       | -0.03, 0.08 | 0.02       | -0.04, 0.08 |
| Locus coeruleus   | 0.02       | -0.05, 0.08 | 0.01          | -0.07, 0.08 | 0.02        | -0.06, 0.11 | 0.02         | -0.04, 0.09 | 0.01       | -0.06, 0.08 | 0.01       | -0.01, 0.02 | -0.08      | -0.22, 0.05  | 0.02        | -0.02, 0.07 | 0.02       | -0.03, 0.08 | 0.02          | -0.09, 0.13 | 0.02       | -0.05, 0.08 | 0.02       | -0.04, 0.08 |

**Note.** To investigate which regions may be driving the associations, independent of the effects from the other regions, multivariable ridge regression models were performed for the regional scales of p-tau severity. Ridge regression is used when there are many independent variables that are highly correlated. A separate ridge regression was performed for each clinical scale. Estimates are standardized betas. Models were adjusted for age at death, racial identity, education level, history of hypertension and obstructive sleep apnea, and history of substance use treatment. Frontal is a summary composite of the dorsolateral frontal cortex and the inferior frontal cortex. CA1, CA2, and CA4 were summed to create the hippocampus composite. For all clinical scales, higher scores are worse.

Abbreviations: CDS = Cognitive Difficulties Scale, BRIEF-A = Behavior Rating Inventory of Executive Function for Adults, MI = Metacognition Index, FAQ = Functional Activities Questionnaire, BRI = Behavioral Regulation Index, BIS-11 = Barratt Impulsiveness Scale, GDS = Geriatric Depression Scale, 15-item version, AES = Apathy Evaluation Scale

**Supplemental Figure 1.** Pairwise Correlation Matrix of the Regional P-tau Semi-Quantitative Rating Scales and Age at Death.

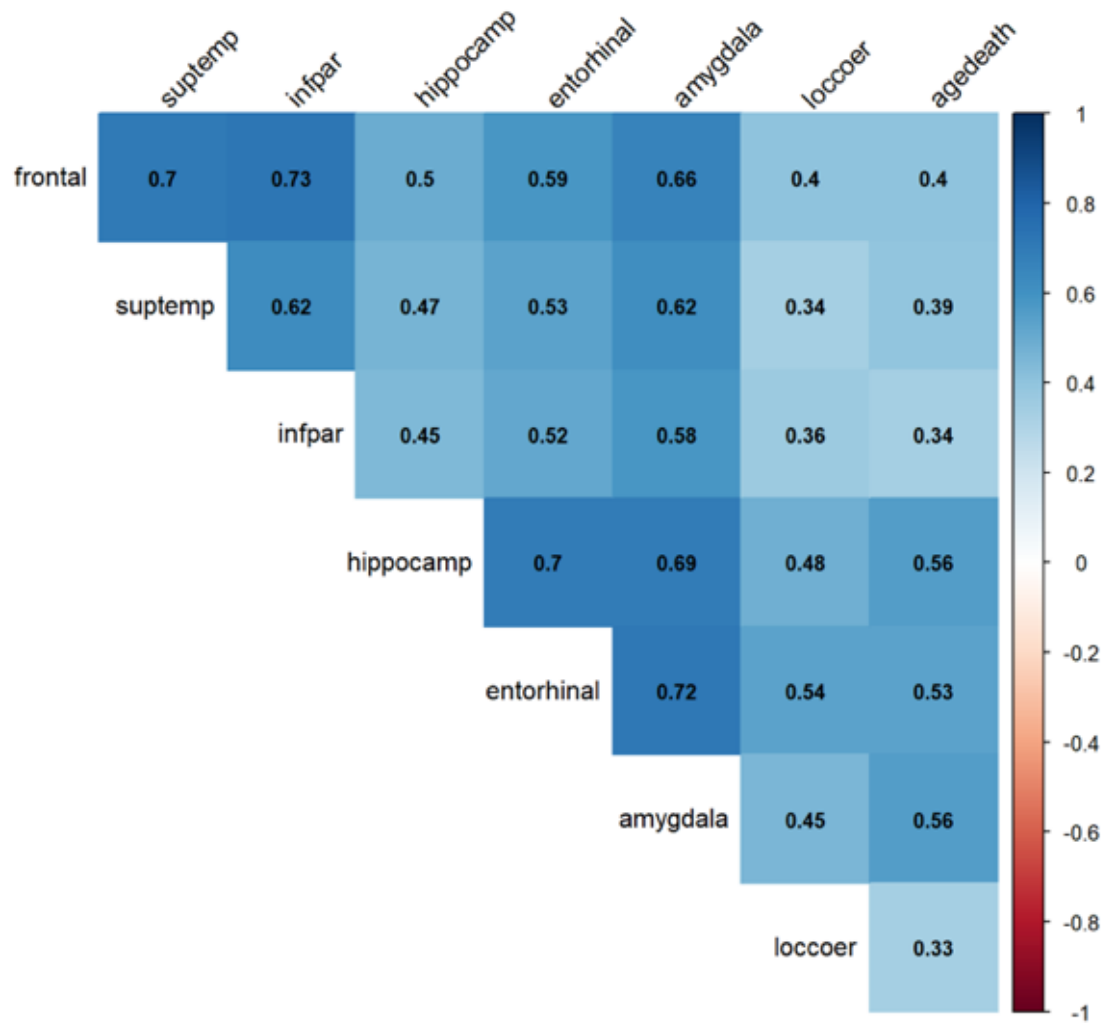

**Supplemental Figure 2. Factor Analysis of the Cognitive Difficulties Scales.**

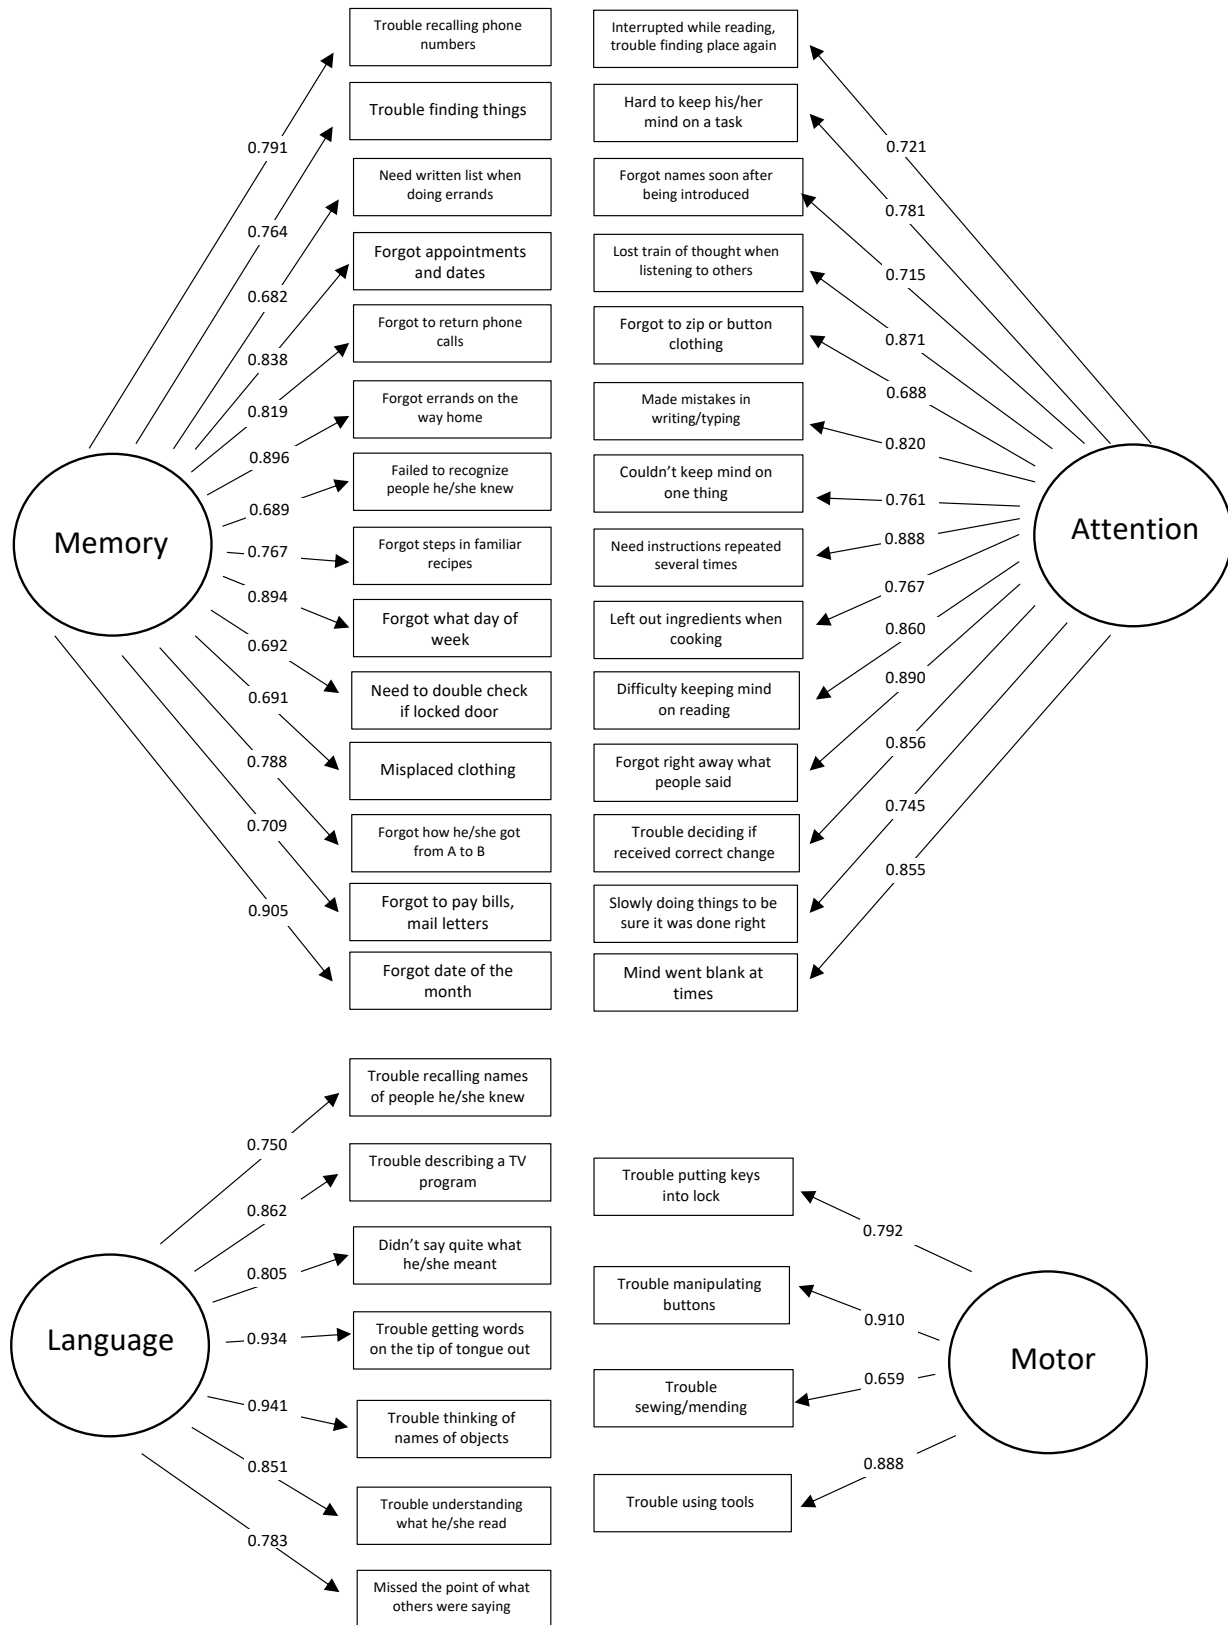

A confirmatory factor analysis of the cognitive difficulties scale (CDS) was performed to derive domain-level cognitive factor scores. A clinical neuropsychologist (MLA) and behavioral neurologist (JM) used their expert judgment to assign each item of the CDS to one of four cognitive domains, including attention, memory, language, and motor. A multidimensional item response theory (MIRT) model was used to derive the CDS factor scores. We used a 4-dimensional nominal response model as our final model and extracted the factor score estimates. The factors and item loadings are shown in the Figure.
